# Supplementary material for: Assessing Delivery of Selected Public Health Operations via Essential Public Health Operation Framework
Source: Int J Environ Res Public Health. 2020 Sep 3;17(17):6435. doi: 10.3390/ijerph17176435 (PMC7503537; doi:10.3390/ijerph17176435)
Supplement: Supplementary file 1 [file ijerph-17-06435-s001.pdf]

# University of Southern Denmark

---

*The questionnaire is based on National Longitudinal Survey of Public Health System Instrument for USA developed by Glen Mays University of Kentucky*

---

**Name of Health Department**

\_\_\_\_\_

**Job title/profession**

\_\_\_\_\_

**Name**

\_\_\_\_\_

**E-mail**

\_\_\_\_\_

**How many years have you worked in Kolding municipality?**

(1) ☐ 1-12 months

(2) ☐ 1-5

(4) ☐ 5-10

(3) ☐ 10+

**1) In the past 3 years in your municipality, has a community needs assessment process been conducted that systematically describes the health status of the municipality?**

- (1) ☐ Yes
- (2) ☐ No
- (3) ☐ Comments \_\_\_\_\_

**If YES: What other types of organizations are involved in performing this activity in your jurisdiction? (mark all that apply)**

- (1) ☐ Kolding Municipality
- (2) ☐ The Danish Health Authority
- (3) ☐ The Regions
- (4) ☐ The Region of Southern Denmark
- (5) ☐ The Danish Working Environment (WEA)
- (6) ☐ The Danish Ministry of Environment and Food
- (7) ☐ Universities
- (8) ☐ National Institute of Public Health (SIF)
- (9) ☐ Statens Serum Institute (SSI)
- (10) ☐ Health Centers
- (11) ☐ Hospitals
- (12) ☐ Physician Practices
- (13) ☐ Health insurers
- (14) ☐ Other state gov't agency
- (15) ☐ Other non-profits
- (16) ☐ None
- (17) ☐ Other - specify \_\_\_\_\_

**How much is the budget for this service approximately?**

---

---

**Who finances this activity or service?**

---

---

**EPHO 4.**

**2) In the past 3 years in your municipality, has a survey of the population for behavioral risk factors (fx. smoking habits, alcohol consumption) been conducted?**

- (1) ☐ Yes
- (2) ☐ No
- (3) ☐ Comments \_\_\_\_\_

**If YES: What other types of organizations are involved in performing this activity in your jurisdiction? (mark all that apply)**

- (1) ☐ Kolding Municipality
- (2) ☐ The Danish Health Authority
- (3) ☐ The Regions
- (4) ☐ The Region of Southern Denmark
- (5) ☐ The Danish Working Environment (WEA)
- (6) ☐ The Danish Ministry of Environment and Food
- (7) ☐ Universities
- (8) ☐ National Institute of Public Health (SIF)
- (9) ☐ Statens Serum Institute (SSI)
- (10) ☐ Health Centers
- (11) ☐ Hospitals
- (12) ☐ Physician Practices
- (13) ☐ Health insurers
- (14) ☐ Other state gov't agency
- (15) ☐ Other non-profits
- (16) ☐ None
- (17) ☐ Other - specify \_\_\_\_\_

**How much is the budget for this service approximately?**

---

---

**Who finances this activity or service?**

---

---

**EPHO 4.**

**3) What areas of effort does your municipality have within health promotion and prevention?**

- ☐ Diet / nutrition
- ☐ Smoking
- ☐ Alcohol
- ☐ Physical Activity
- ☐ Chronic Obstructive Pulmonary Disease (COPD)
- ☐ Mental health
- ☐ Drug abuse
- ☐ CVD
- ☐ Diabetes
- ☐ Other - specify \_\_\_\_\_

**EPHO 3.**

**4) In your municipality, are timely investigations of adverse health events conducted on an ongoing basis, including communicable disease outbreaks and environmental health hazards?**

- (1) ☐ Yes
- (2) ☐ No
- (3) ☐ Comments \_\_\_\_\_

**If YES: What other types of organizations are involved in performing this activity in your jurisdiction? (mark all that apply)**

- (1) ☐ Kolding Municipality
- (2) ☐ The Danish Health Authority
- (3) ☐ The Regions
- (4) ☐ The Region of Southern Denmark
- (5) ☐ The Danish Working Environment (WEA)
- (6) ☐ The Danish Ministry of Environment and Food
- (7) ☐ Universities
- (8) ☐ National Institute of Public Health (SIF)
- (9) ☐ Statens Serum Institute (SSI)
- (10) ☐ Health Centers
- (11) ☐ Hospitals
- (12) ☐ Physician Practices
- (13) ☐ Health insurers
- (14) ☐ Other state gov't agency
- (15) ☐ Other non-profits
- (16) ☐ None
- (17) ☐ Other - specify \_\_\_\_\_

**How much is the budget for this service approximately?**

---

---

**Who finances this activity or service?**

---

---

**EPHO 3.**

**5) In your municipality, are timely investigations of adverse health events conducted on**

**an ongoing basis, including occupational health risks (illnesses and injuries in the workplace)?**

- (1) ☐ Yes
- (2) ☐ No
- (3) ☐ Comments \_\_\_\_\_

**If YES: What other types of organizations are involved in performing this activity in your jurisdiction? (mark all that apply)**

- (1) ☐ Kolding Municipality
- (2) ☐ The Danish Health Authority
- (3) ☐ The Regions
- (4) ☐ The Region of Southern Denmark
- (5) ☐ The Danish Working Environment (WEA)
- (6) ☐ The Danish Ministry of Environment and Food
- (7) ☐ Universities
- (8) ☐ National Institute of Public Health (SIF)
- (9) ☐ Statens Serum Institute (SSI)
- (10) ☐ Health Centers
- (11) ☐ Hospitals
- (12) ☐ Physician Practices
- (13) ☐ Health insurers
- (14) ☐ Other state gov't agency
- (15) ☐ Other non-profits
- (16) ☐ None
- (17) ☐ Other - specify \_\_\_\_\_

**How much is the budget for this service approximately?**

---

---

**Who finances this activity or service?**

---

---

**EPHO 5.**

**6) In your municipality, are the necessary laboratory services (fx. hospitals, physicians' practices) available to support investigations of adverse health events and meet routine diagnostic and surveillance needs for your jurisdiction?**

- (1) ☐ Yes
- (2) ☐ No
- (3) ☐ Comments \_\_\_\_\_

**If YES: What other types of organizations are involved in performing this activity in your jurisdiction? (mark all that apply)**

- (1) ☐ Kolding Municipality
- (2) ☐ The Danish Health Authority
- (3) ☐ The Regions
- (4) ☐ The Region of Southern Denmark
- (5) ☐ The Danish Working Environment (WEA)
- (6) ☐ The Danish Ministry of Environment and Food
- (7) ☐ Universities
- (8) ☐ National Institute of Public Health (SIF)
- (9) ☐ Statens Serum Institute (SSI)
- (10) ☐ Health Centers
- (11) ☐ Hospitals
- (12) ☐ Physician Practices
- (13) ☐ Health insurers
- (14) ☐ Other state gov't agency
- (15) ☐ Other non-profits
- (16) ☐ None

(17) ☐ Other - specify \_\_\_\_\_

**How much is the budget for this service approximately?**

---

---

**Who finances this activity or service?**

---

---

#### **EPHO 4**

**7) In the past 3 years in your jurisdiction, has an analysis been completed of the determinants of and contributing factors to priority health needs and the population groups most effected?**

- (1) ☐ Yes
- (2) ☐ No
- (3) ☐ Comments \_\_\_\_\_

**If YES: What other types of organizations are involved in performing this activity in your jurisdiction? (mark all that apply)**

- (1) ☐ Kolding Municipality
- (2) ☐ The Danish Health Authority
- (3) ☐ The Regions
- (4) ☐ The Region of Southern Denmark
- (5) ☐ The Danish Working Environment (WEA)
- (6) ☐ The Danish Ministry of Environment and Food
- (7) ☐ Universities
- (8) ☐ National Institute of Public Health (SIF)
- (9) ☐ Statens Serum Institute (SSI)
- (10) ☐ Health Centers

- (11) ☐ Hospitals
- (12) ☐ Physician Practices
- (13) ☐ Health insurers
- (14) ☐ Other state gov't agency
- (15) ☐ Other non-profits
- (16) ☐ None
- (17) ☐ Other - specify \_\_\_\_\_

**How much is the budget for this service approximately?**

---

---

**Who finances this activity or service?**

---

---

**EPHO 5.**

**8) In your municipality, is there a collaboration with other health-related organizations with regard to health promotion and disease prevention initiatives (e.g. screening programs, vaccination programs)?**

- (1) ☐ Yes
- (2) ☐ No
- (3) ☐ Comments \_\_\_\_\_

**If YES: What other types of organizations are involved in performing this activity in your jurisdiction? (mark all that apply)**

- (1) ☐ Kolding Municipality
- (2) ☐ The Danish Health Authority
- (3) ☐ The Regions
- (4) ☐ The Region of Southern Denmark

- (5) ☐ The Danish Working Environment (WEA)
- (6) ☐ The Danish Ministry of Environment and Food
- (7) ☐ Universities
- (8) ☐ National Institute of Public Health (SIF)
- (9) ☐ Statens Serum Institute (SSI)
- (10) ☐ Health Centers
- (11) ☐ Hospitals
- (12) ☐ Physician Practices
- (13) ☐ Health insurers
- (14) ☐ Other state gov't agency
- (15) ☐ Other non-profits
- (16) ☐ None
- (17) ☐ Other - specify \_\_\_\_\_

**How much is the budget for this service approximately?**

---

---

**Who finances this activity or service?**

---

---

**EPHO 3, 4, 5.**

**9) In your municipality, is there a network of support and communication relationships with other health-related organizations about the health problems in the community?**

- (1) ☐ Yes
- (2) ☐ No
- (3) ☐ Comments \_\_\_\_\_

**If YES: What other types of organizations are involved in performing this activity in your jurisdiction? (mark all that apply)**

- (1) ☐ Kolding Municipality
- (2) ☐ The Danish Health Authority
- (3) ☐ The Regions
- (4) ☐ The Region of Southern Denmark
- (5) ☐ The Danish Working Environment (WEA)
- (6) ☐ The Danish Ministry of Environment and Food
- (7) ☐ Universities
- (8) ☐ National Institute of Public Health (SIF)
- (9) ☐ Statens Serum Institute (SSI)
- (10) ☐ Health Centers
- (11) ☐ Hospitals
- (12) ☐ Physician Practices
- (13) ☐ Health insurers
- (14) ☐ Other state gov't agency
- (15) ☐ Other non-profits
- (16) ☐ None
- (17) ☐ Other - specify \_\_\_\_\_

**How much is the budget for this service approximately?**

---

---

**Who finances this activity or service?**

---

---

**EPHO 4 and 5.**

**10) Does the municipality coordinate action plans with other health-related organizations?**

- (1) ☐ Yes
- (2) ☐ No
- (3) ☐ Comments \_\_\_\_\_

**If YES: What other types of organizations are involved in performing this activity in your jurisdiction? (mark all that apply)**

- (1) ☐ Kolding Municipality
- (2) ☐ The Danish Health Authority
- (3) ☐ The Regions
- (4) ☐ The Region of Southern Denmark
- (5) ☐ The Danish Working Environment (WEA)
- (6) ☐ The Danish Ministry of Environment and Food
- (7) ☐ Universities
- (8) ☐ National Institute of Public Health (SIF)
- (9) ☐ Statens Serum Institute (SSI)
- (10) ☐ Health Centers
- (11) ☐ Hospitals
- (12) ☐ Physician Practices
- (13) ☐ Health insurers
- (14) ☐ Other state gov't agency
- (15) ☐ Other non-profits
- (16) ☐ None
- (17) ☐ Other - specify \_\_\_\_\_

**How much is the budget for this service approximately?**

---

---

**Who finances this activity or service?**

---

---

**EPHO 4.**

**11) In the past 3 years in your municipality, has a community health action plan been developed with community participation to address community health needs?**

- (1) ☐ Yes
- (2) ☐ No
- (3) ☐ Comments \_\_\_\_\_

**If YES: Overall, how well is this activity performed within your municipality?**

- (1) ☐ Poor - meets none of the need for this activity
- (2) ☐ Moderate - meets about half of the need
- (3) ☐ Good - meets most of the need for this activity
- (4) ☐ Excellent – fully meets need for this activity

**If YES: What other types of organizations are involved in performing this activity in your jurisdiction? (mark all that apply)**

- (1) ☐ Kolding Municipality
- (2) ☐ The Danish Health Authority
- (3) ☐ The Regions
- (4) ☐ The Region of Southern Denmark
- (5) ☐ The Danish Working Environment (WEA)
- (6) ☐ The Danish Ministry of Environment and Food
- (7) ☐ Universities
- (8) ☐ National Institute of Public Health (SIF)
- (9) ☐ Statens Serum Institute (SSI)
- (10) ☐ Health Centers
- (11) ☐ Hospitals
- (12) ☐ Physician Practices
- (13) ☐ Health insurers

(14) ☐ Other state gov't agency

(15) ☐ Other non-profits

(16) ☐ None

(17) ☐ Other - specify \_\_\_\_\_

**How much is the budget for this service approximately?**

---

---

**Who finances this activity or service?**

---

---

#### **EPHO 4.**

**12) In the past 3 years in your municipality, have plans been developed to allocate resources in a manner consistent with priorities established from a community health needs assessment?**

(1) ☐ Yes

(2) ☐ No

(3) ☐ Comments \_\_\_\_\_

**If YES: What other types of organizations are involved in performing this activity in your jurisdiction? (mark all that apply)**

(1) ☐ Kolding Municipality

(2) ☐ The Danish Health Authority

(3) ☐ The Regions

(4) ☐ The Region of Southern Denmark

(5) ☐ The Danish Working Environment (WEA)

(6) ☐ The Danish Ministry of Environment and Food

- (7) ☐ Universities
- (8) ☐ National Institute of Public Health (SIF)
- (9) ☐ Statens Serum Institute (SSI)
- (10) ☐ Health Centers
- (11) ☐ Hospitals
- (12) ☐ Physician Practices
- (13) ☐ Health insurers
- (14) ☐ Other state gov't agency
- (15) ☐ Other non-profits
- (16) ☐ None
- (17) ☐ Other - specify \_\_\_\_\_

**How much is the budget for this service approximately?**

---

---

**Who finances this activity or service?**

---

---

**EPHO 3, 4, and 5.**

**13) In your municipality, is existing evidence (epidemiological studies, etc.) used as a basis for decision-making regarding prioritization of focus areas?**

- (1) ☐ Yes
- (2) ☐ No
- (3) ☐ Comments \_\_\_\_\_

**If YES: Overall, how well is this activity performed within your municipality?**

- (1) ☐ Poor - meets none of the need for this activity
- (2) ☐ Moderate - meets about half of the need

- (3) ☐ Good - meets most of the need for this activity
- (4) ☐ Excellent – fully meets need for this activity

**If YES: What other types of organizations are involved in performing this activity in your jurisdiction? (mark all that apply)**

- (1) ☐ Kolding Municipality
- (2) ☐ The Danish Health Authority
- (3) ☐ The Regions
- (4) ☐ The Region of Southern Denmark
- (5) ☐ The Danish Working Environment (WEA)
- (6) ☐ The Danish Ministry of Environment and Food
- (7) ☐ Universities
- (8) ☐ National Institute of Public Health (SIF)
- (9) ☐ Statens Serum Institute (SSI)
- (10) ☐ Health Centers
- (11) ☐ Hospitals
- (12) ☐ Physician Practices
- (13) ☐ Health insurers
- (14) ☐ Other state gov't agency
- (15) ☐ Other non-profits
- (16) ☐ None
- (17) ☐ Other - specify \_\_\_\_\_

**EPHO 4.**

**14) In the past 3 years in your municipality, have there been regular evaluations of the effects of public health services on community health status?**

- (1) ☐ Yes
- (2) ☐ No
- (3) ☐ Comments \_\_\_\_\_

**If YES: What other types of organizations are involved in performing this activity in your jurisdiction? (mark all that apply)**

- (1) ☐ Kolding Municipality
- (2) ☐ The Danish Health Authority
- (3) ☐ The Regions
- (4) ☐ The Region of Southern Denmark
- (5) ☐ The Danish Working Environment (WEA)
- (6) ☐ The Danish Ministry of Environment and Food
- (7) ☐ Universities
- (8) ☐ National Institute of Public Health (SIF)
- (9) ☐ Statens Serum Institute (SSI)
- (10) ☐ Health Centers
- (11) ☐ Hospitals
- (12) ☐ Physician Practices
- (13) ☐ Health insurers
- (14) ☐ Other state gov't agency
- (15) ☐ Other non-profits
- (16) ☐ None
- (17) ☐ Other - specify \_\_\_\_\_

**How much is the budget for this service approximately?**

---

---

**Who finances this activity or service?**

---

---

**EPHO 5:**

**15) In the past 3 years in your municipality, have professionally recognized process and outcome measures been used to monitor public health programs and to redirect resources as appropriate?**

- (1) ☐ Yes
- (2) ☐ No
- (3) ☐ Comments \_\_\_\_\_

**If YES: What other types of organizations are involved in performing this activity in your jurisdiction? (mark all that apply)**

- (1) ☐ Kolding Municipality
- (2) ☐ The Danish Health Authority
- (3) ☐ The Regions
- (4) ☐ The Region of Southern Denmark
- (5) ☐ The Danish Working Environment (WEA)
- (6) ☐ The Danish Ministry of Environment and Food
- (7) ☐ Universities
- (8) ☐ National Institute of Public Health (SIF)
- (9) ☐ Statens Serum Institute (SSI)
- (10) ☐ Health Centers
- (11) ☐ Hospitals
- (12) ☐ Physician Practices
- (13) ☐ Health insurers
- (14) ☐ Other state gov't agency
- (15) ☐ Other non-profits
- (16) ☐ None
- (17) ☐ Other - specify \_\_\_\_\_

**How much is the budget for this service approximately?**

---

---

**Who finances this activity or service?**

---

---

**EPHO 5.**

**16) In the past 3 years in your municipality, has the public regularly received information about current health status, health care needs, health behaviors, and health care policy issues?**

- (1) ☐ Yes
- (2) ☐ No
- (3) ☐ Comments \_\_\_\_\_

**If YES: What other types of organizations are involved in performing this activity in your jurisdiction? (mark all that apply)**

- (1) ☐ Kolding Municipality
- (2) ☐ The Danish Health Authority
- (3) ☐ The Regions
- (4) ☐ The Region of Southern Denmark
- (5) ☐ The Danish Working Environment (WEA)
- (6) ☐ The Danish Ministry of Environment and Food
- (7) ☐ Universities
- (8) ☐ National Institute of Public Health (SIF)
- (9) ☐ Statens Serum Institute (SSI)
- (10) ☐ Health Centers
- (11) ☐ Hospitals
- (12) ☐ Physician Practices
- (13) ☐ Health insurers
- (14) ☐ Other state gov't agency
- (15) ☐ Other non-profits

(16) ☐ None

(17) ☐ Other - specify \_\_\_\_\_

**How much is the budget for this service approximately?**

---

---

**Who finances this activity or service?**

---

---

**EPHO 5 and 4.**

**17) Select the top 3 methods that the municipality use to educate people about the public health services available to them.**

(11) ☐ Facebook

(1) ☐ Twitter

(2) ☐ Instagram

(3) ☐ Press release

(4) ☐ Purchase media

(5) ☐ News Paper

(6) ☐ Meeting with healthcare provider

(7) ☐ Brochures

(8) ☐ E-mail

(9) ☐ Website

(10) ☐ Posters/ Flyers

(12) ☐ None

(13) ☐ Other - specify \_\_\_\_\_
